# Phage efficacy in infecting dual-strain biofilms of *Pseudomonas aeruginosa*

Samuele Testa<sup>a,1</sup>, Sarah Berger<sup>a,1</sup>, Philippe Piccardi<sup>a</sup>, Frank Oechslin<sup>a,b</sup>, Grégory Resch<sup>a</sup>, and Sara Mitri<sup>a,c</sup>

<sup>a</sup>Department of Fundamental Microbiology, University of Lausanne, CH-1015 Lausanne, Switzerland

<sup>b</sup>Department of Biochemistry, Microbiology and Bioinformatics, Université Laval, Québec City, Canada

<sup>c</sup>Swiss Institute for Bioinformatics

<sup>1</sup>These authors have contributed equally.

**Bacterial viruses, or phage, play a key role in shaping natural microbial communities. Yet much research on bacterial-phage interactions has been conducted in liquid cultures involving single bacterial strains. Critically, phage often have a very narrow host range meaning they can only ever target a subset of strains in a community. Here we explore how strain diversity affects the success of lytic phage in structured communities. In particular, we infect a susceptible *Pseudomonas aeruginosa* strain PAO1 with lytic phage *Pseudomonas* 352 in the presence versus absence of an insensitive *P. aeruginosa* strain PA14, in liquid culture versus colonies growing on agar. We find that competition between the two bacterial strains reduces the likelihood of the susceptible strain evolving resistance to the phage. This result holds in liquid culture and in colonies. However, while in liquid the phage eliminate the whole sensitive population, colonies contain refuges wherein bacteria can remain sensitive yet escape phage infection. These refuges form mainly due to reduced growth in colony centers. We find little evidence that the presence of the insensitive strain provides any additional protection against phage. Our study reveals that living in a spatially structured population can protect bacteria against phage infection, while the presence of competing strains may instead reduce the likelihood of evolving resistance to phage, if encountered.**

**Bacterial colony | resistance | evolution | microbial communities | population dynamics | spatial structure | phage therapy**

**Correspondence: [sara.mitri@unil.ch](mailto:sara.mitri@unil.ch)**

## Introduction

Lytic bacteriophage, or simply “phage”, are viruses that infect bacterial cells, replicate within them and then lyse them to spread and infect new hosts. Lytic phage are major bacterial predators that are highly abundant in number and distribution, thereby playing a key role in regulating bacterial population dynamics (1). Despite this potential importance, phage are rarely considered in studies of natural bacterial communities, such as the human microbiome project, or the Earth microbiome project – although this is beginning to change (2–5).

Their ability to reduce bacterial populations has also been harnessed as a therapeutic method, in “phage therapy”, whereby specific phage targeting a given bacterial pathogen is administered to patients to eliminate infections (6, 7). As we struggle to find solutions to tackle the emergence of antibiotic resistance (8), phage therapy has experienced renewed interest as a possible replacement or complementary treatment to antibiotics.

Although our appreciation of the importance of phage biology is on the rise, the experimental systems used to study phage still limit our understanding of their ecology and evolution in natural environments (9). Phages are typically studied in liquid cultures in the laboratory using a single phage and a single bacterial strain at a time. On the other extreme of the spectrum, clinical studies have been performed where phage cocktails are administered to animal or human hosts (10–13). Given all the complexity that such environments bring, it is difficult to explain differences between the results of laboratory and clinical studies (10, 11, 14, 15). Knowledge at an intermediate scale of complexity is clearly missing. Here, we expand on typical laboratory methods to study two dimensions of environmental complexity that likely matter in real microbial ecology: the presence of other bacterial strains, and life in a spatially-structured environment.

Bacteria rarely live in clonal groups, but typically share their environment with different microbial strains and species in dense, surface-attached cell groups called biofilms. Natural communities such as the human microbiome, or soil communities are hugely diverse (16, 17), including a large repertoire of phages (3, 18–20). Each of these phages tends to be quite host-specific, killing only a narrow range of bacterial strains (but see (21)). When phage attack a given target strain, we can expect little collateral damage to surrounding strains, and may therefore be tempted to also expect infection of the target to be independent of community structure. However, the presence of insensitive strains has been found to alter treatment outcomes by affecting target strain survival. Indeed, Harcombe & Bull (22) have shown that competition with a co-inhabiting species could reduce the ability of the targeted sensitive strain to survive phage attack. Their study considered liquid cultures, however. Since then, it has been shown that the spatial organization of different bacterial strains and species within biofilms can drive social interactions and the evolutionary trajectories of bacterial communities (23, 24). Biofilm-associated bacteria also have a higher survival rate compared to planktonic bacteria (25), particularly when exposed to antibiotics and importantly, also to phage (26). More generally, phage population dynamics differ radically between liquid bacterial cultures and bacteria growing on solid surfaces (27).

Here we show that both of these factors – the presence of other strains, and spatial structure – separately and combined affect the outcome of phage predation on the pathogen *Pseu-*

91 *domonas aeruginosa*, and its ensuing population dynamics. 147  
92 In particular, we target *P. aeruginosa* strain PAO1 with Pseu- 148  
93 domonas phage 352 to which it is sensitive, in the presence 149  
94 and absence of a second strain, *P. aeruginosa* PA14 that is in- 150  
95 sensitive to the phage. Since phage are so specific, we believe 151  
96 the choice of a closely-related phage-insensitive strain to be 152  
97 a realistic one. We compare the outcome for PAO1 in a well- 153  
98 mixed liquid environment and a structured biofilm (colony) 154  
99 growing on a solid agar surface. 155

100 We find that in liquid, competition between the two strains 156  
101 can reduce the population size of the target strain PAO1, giv- 157  
102 ing a competitive advantage to the phage and eliminating 158  
103 PAO1 without the emergence of resistance. Indeed, evol- 159  
104 ving resistance to the phage was the only way for PAO1 to 160  
105 survive phage attack in liquid. In contrast, in a biofilm 161  
106 treated with phage, PAO1 survived in the presence of the 162  
107 phage-insensitive strain PA14 without becoming resistant it- 163  
108 self. Survival in the face of a phage attack, however, did 164  
109 not depend on PA14 but occurred in all biofilms, regardless 165  
110 of the presence of other strains. Instead, slower growth in 166  
111 the colony center appears to be the main mechanism that re- 167  
112 duces the ability of the phage to replicate and spread through 168  
113 biofilms containing sensitive bacteria. The main effect of 169  
114 PA14 in the biofilm was instead in greatly reducing the like- 170  
115 lihood of phage-resistance in PAO1. 171

## 116 Results 172

### 117 Inter-strain competition increases phage infectivity 174 118 and reduces resistance evolution in liquid. 175

119 We first sought to understand how treating a target strain *P. aerugi-* 176  
120 *nosa* PAO1 (henceforth PAO1) with Pseudomonas phage 352 177  
121 in well-mixed liquid cultures is affected by the presence of 178  
122 a phage-insensitive strain *P. aeruginosa* PA14 (henceforth 179  
123 PA14). These liquid experiments involved growing bacteria 180  
124 in 96-well plates containing TSB and inoculated with mix- 181  
125 tures of bacteria and phage over a period of 48 hours. 182

126 In control treatments with PAO1 growing alone, we observed 183  
127 that phage treatment resulted in a drop in PAO1 population 184  
128 size after 6 hours, after which the population recovered some- 185  
129 what but not entirely (Fig. 1A). Assays testing for phage resis- 186  
130 tance (see Methods) revealed that after 24 hours of culture, 187  
131 62 out of 63 tested colonies (98.41%) were resistant to the 188  
132 phage, while after 48 hours, 24 out of 24 (100%) were resis- 189  
133 tant. As a control, resistant PA14 cells growing alone were 190  
134 not significantly affected by the phage (Fig. 1B). 191

135 Next, we co-cultured the two strains in the absence of phage 192  
136 and found that PAO1 grew worse than when it was alone, 193  
137 presumably due to competition with PA14 (Fig. 1C). Fi- 194  
138 nally, adding the phage to this co-culture eliminated all PAO1 195  
139 within 6 hours (Fig. 1D). Compared to growing alone then, 196  
140 PAO1 resistance could not emerge when growing with a com- 197  
141 petitor. 198

142 We hypothesized that the presence of PA14 prevented PAO1 199  
143 from increasing its population size, thereby decreasing its 200  
144 potential to evolve resistance to the phage and survive the 201  
145 treatment. To test for the effect of population size on resis- 202  
146 tance evolution, we conducted two experiments. First, we

grew PAO1 in the presence of phage with different starting  
population sizes, while maintaining the multiplicity of infection (MOI) constant at 1 (1 phage for each bacterium). In agreement with our hypothesis, resistance to the phage emerged when the initial population size was greater than  $10^4$  CFU/ml (Fig. 1E). Second, we kept the initial population size of PAO1 constant at  $10^6$  CFU/ml and varied the starting population size of its competitor PA14 in the presence of phage (MOI=1). Again, as predicted, phage resistance could emerge when there were fewer competitors, but once the number of competitors at the start exceeded  $10^6$  CFU/ml, PAO1 cells were all killed by the phage at the end of 21 hours of co-culture (Fig. 1F). In all cases, PAO1 survival depended on becoming resistant to the phage.

In sum, in liquid culture, competition with a resident strain can prevent a targeted strain from surviving phage treatment, which is consistent with previous research (22).

### 117 Phage infect sensitive PAO1 in mono-culture colonies. 174

118 To simulate a setup where a biofilm forms on a solid surface 175  
119 and is later exposed to phage, we first grew the bacteria on 176  
120 a membrane filter placed on LB agar for approximately 12 177  
121 hours until they had formed a small colony. We then trans- 178  
122 ferred the filter with the 12-hour colony onto a new LB agar 179  
123 plate containing an air-dried drop (approximately the diame- 180  
124 ter of the filter) of either  $\sim 10^6$  phage,  $\sim 10^9$  phage, or no drop 181  
125 as a control. All colonies were left to grow in the presence 182  
126 or absence of the phage for an additional 36 hours, approxi- 183  
127 mately (see Methods, Fig. 2A). 184

119 In PAO1 mono-culture colonies treated with phage, popu- 175  
120 lations ceased to grow following phage arrival (comparison 176  
121 of CFUs at 12 and 48 hours,  $df = 29$ ,  $P = 0.58$ , Fig. 2C, 177  
122 S1, S2), and there were significantly fewer bacteria in the 178  
123 phage treatment compared to the control ( $7.96 \pm 6.02 \times 10^7$  179  
124 with phage, versus  $7.51 \pm 3.82 \times 10^8$  without,  $df = 23$ ,  $P <$  180  
125  $0.001$ , Fig. S1, S2). Fluorescence microscopy images taken 181  
126 immediately prior to infection and 36 hours later showed that 182  
127 colonies treated with phage were smaller in diameter than 183  
128 non-treated colonies, with the fluorescent cells still visible 184  
129 in the center of the colony (Fig. 2B, middle column, Fig. 185  
130 S3). In the colonies that had been treated with phage, resis- 186  
131 tance to the phage was detected in 14 out of 15 colonies 187  
132 across five similar experiments, with resistant cells forming 188  
133 between  $\sim 0.04$  and 20% of the total population at low ( $\sim 10^6$  189  
134 PFU/ml) initial phage dose (Fig. 2D, Fig. S5). At high initial 190  
135 phage dose ( $\sim 10^9$  PFU/ml), the majority of surviving cells 191  
136 were found to be resistant to the phage, but a sub-population 192  
137 of sensitive cells survived in all replicates (Fig. S2F). 193

### 117 Infection and the emergence of phage-resistance in 174 118 PAO1 occurs mainly at colony edges. 175

119 We wondered why so many sensitive cells survived and where in the colony resis- 176  
120 tance had occurred. To answer this question, before har- 177  
121 vesting the colonies for quantification, we touched an inocu- 178  
122 lation loop in the center of the colony, resuspended its con- 179  
123 tents in PBS and plated the suspension to quantify the number 180  
124 of resistant and sensitive cells, as well as phage (see Meth- 181  
125 ods). We found no resistant cells in the center of any of the 182

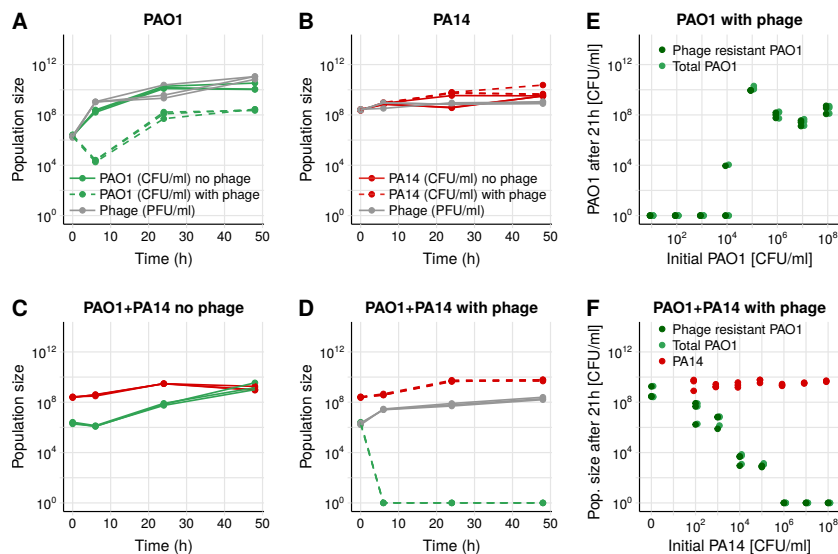

**Fig. 1.** Phage efficacy in liquid. (A) Growth of PAO1 (in CFU/ml) in liquid over 48h. PAO1 grows without phage (solid green lines), but in its presence (dashed green lines) PAO1 decreases then rebounds, resulting in a resistant population (statistics in main text). The phage population (in PFU/ml, gray lines) increases accordingly. (B) PA14 (phage resistant), grows similarly in the presence or absence of phage (dashed or solid red lines, respectively), while phage (gray) remain approximately constant. (C) When PAO1 (green) and PA14 (red) are grown in co-culture in the absence of phage, PAO1 grows worse than alone. (D) When phage are added to the co-culture, PAO1 population size drops below the detection limit at 6 hours and does not recover. (E) PAO1 is grown together with phage in triplicate at different initial population sizes (MOI=1). At the end of the experiment, bacteria are plated onto agar plates saturated with phage or not to count the resistant and total population (see Methods). A starting population size greater than  $\sim 10^4$  allows resistance to emerge. (F) Initial population size of PAO1 was always  $\sim 10^6$ , while initial PA14 numbers varied as on the x-axis. Once PA14 became too numerous (greater than  $\sim 10^6$ ), PAO1 could no longer maintain its population size high enough for resistance to the phage to emerge. Red, light green and dark green points show population size of PA14, total PAO1 and resistant PAO1, respectively, at 21h.

colonies (Fig. 2D, Fig. S5), suggesting that resistance arose closer to the colony edges where most cellular growth occurs (28). Phage were nevertheless detected in the center, but the ratio of phage to uninfected cells was significantly lower than in the colony as a whole (PFU/CFU of  $0.99 \pm 0.27$  in the center and  $276.5 \pm 11$  in the whole colony, paired t-test,  $P < 0.001$ , Fig. 2E). This suggests that the phage could spread to the center of the colony, but left a proportion of cells uninfected. Further evidence that some cells in the center were infected was that after washing to remove phage and plating on fresh agar, most cells lysed (Fig. S7), resembling “pseudodysogeny” or “hibernation”, which occurs in starved cells in stationary phase or persister cells, where phage DNA accumulates in the cell. Only once bacteria start growing again do viral capsids form and the phage resume their lytic cycle (27, 29–33). However, transmission electron microscopy images of the colony revealed many intact cells containing phage with assembled capsids that had not yet lysed, in addition to some debris from lysed cells (Fig. S8). While phage were able to assemble – contrary to expectations for pseudodysogeny – the presence of unlysed and uninfected cells suggests a delay in lysis, which may explain why phage could not spread further and increase their numbers in the colony center.

**Phage penetration into colonies of insensitive PA14 is limited.** In contrast, PA14 (the phage insensitive strain) mono-culture colonies were indistinguishable with and without phage treatment (Fig. 2B, C, t-test CFUs with and without phage,  $df=2.6$ ,  $P=0.87$ , Fig. S1, S6). On sampling the colony centers, we never found phage in any of the colonies treated with a low phage dosage, but detected a few at the high initial dose of phage (on average 1 phage to every 863 PA14 cells). This suggests that phage could not diffuse much from the agar into PA14 colonies. Indeed, total phage populations fell to  $11 \pm 2.8\%$  of their original size in PA14 colonies over the 36 hours, which we suspect is due to toxicity of

LB to phage (34) or temperature sensitivity, given that phage populations also fell to  $8.1 \pm 5.4\%$  in the absence of any bacteria (Fig. 2C, t-test with and without PA14:  $P=0.21$ ). To determine whether phage could attach to PA14 cells, we performed an adsorption assay in liquid, and found that after 5 minutes of exposure to bacteria, phage only attached to PAO1 cells, but not PA14 (Fig. S9).

Taken together, in single-strain colonies we observe that PAO1 death and the emergence of phage resistance occurs mainly at the edges of the colony where cells are more actively growing. Only very few phage could spread into insensitive PA14 colonies at high phage titer, demonstrating that physical diffusion into colonies is very limited. Instead, cycles of attachment, infection and lysis allow phage to propagate deeper into colonies of sensitive PAO1. Phage can therefore infect some, but not lyse all PAO1 cells at the colony centers, where they are less metabolically active.

**Phage infect sensitive PAO1 in mixed colonies.** Knowing that phage cannot diffuse into PA14 colonies, we next asked how the presence of this insensitive strain would impact the survival of the targeted PAO1 within a colony containing both strains and treated with phage. We repeated the experiment (Fig. 2A) with a mixture of both PAO1 and PA14 at an initial ratio of 1:10, such that an approximate 1:1 ratio was reached on phage exposure after 12h (Fig. S1).

As in the phage-treated PAO1 mono-culture colony, PAO1 in the treated mixed colonies did not increase significantly following phage treatment ( $df = 17$ ,  $P = 0.47$ , Fig. 2C, Fig. S2), and the phage treatment significantly reduced PAO1 cells compared to the untreated control ( $df = 17$ ,  $P < 0.001$ ), demonstrating significant bacterial infection by phage. In addition, microscopy showed that patches of PAO1 (white arrowheads in Fig. 2B, right center) were absent from the edges of the colonies treated with phage (Fig. 2B, bottom right). Together, these data suggest that as in PAO1 colonies, cell lysis occurs at the actively growing edges.



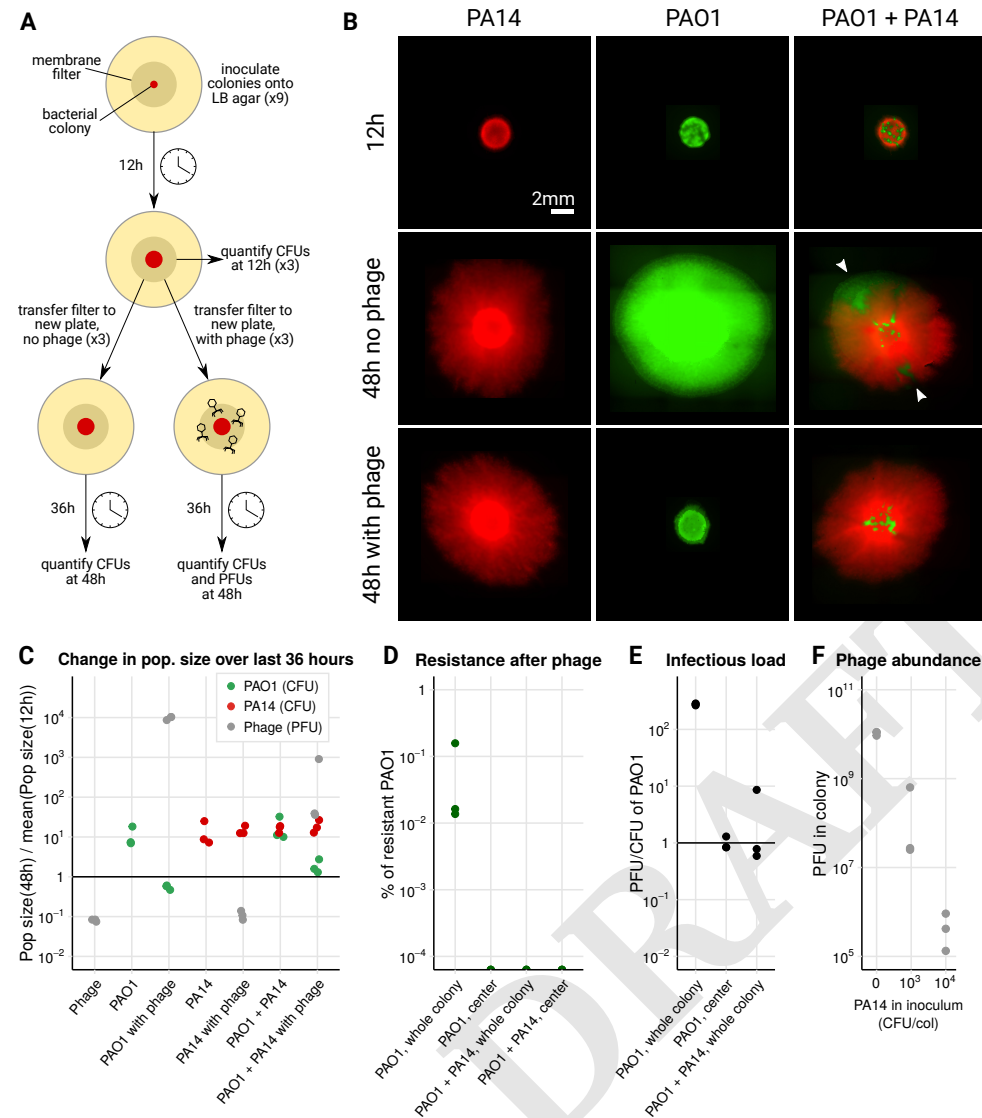

**Fig. 2.** Phage efficacy in colonies. (A) All colonies (PAO1 alone, PA14 alone or PAO1 + PA14) were first grown by inoculating a drop of cells onto a membrane filter placed on a 0.1x LB agar plate in 9 replicates. After 12 hours (duration varied somewhat between experiments), 3 filters were removed to quantify CFUs, 3 were transferred to a new 0.1x LB agar plate containing a dried 50 $\mu$ l drop of phage containing  $\sim 10^6$  PFU/ml, and 3 to a new 0.1x LB agar plate containing no phage. After 36 hours (with some variation) the remaining 6 filters were harvested to quantify CFUs and/or PFUs (see Methods). (B) Fluorescence microscopy images of the colonies at 12 and 48 hours. PA14 are tagged with mCherry (red) and PAO1 with GFP (green). Sectors that normally formed in untreated colonies (white arrowheads, center right) were absent in the phage treatment (bottom right) suggesting that phage kill cells at the colony edges where cells are most active, while cells in the center survive. See Fig. S3 for images from a similar experiment. (C-F) Data coming from triplicate colonies of a single experiment using unlabelled PA14. These data do not correspond to the images in (B), whose quantification was less precise (see Fig. S6) because PA14-mCherry were difficult to distinguish from PAO1-GFP (identical drug resistances). (C) The ratio of population sizes at 48 and 12 hours (see Fig. S1 for growth curves). Phage decrease the population size of PAO1 (green), resistant PA14 grow similarly across conditions (red), and phage decrease in the absence of PAO1 and increase in its presence. (D) We observed no phage resistance in the sampled centers of PAO1 colonies, or in colonies mixed with PA14. (E) To determine whether phage could reach colony centers, we quantified PAO1 and phage in the colony centers. The ratio of PFUs to CFUs was lower in the colony centers, and in whole mixed colonies compared to whole colonies of PAO1 alone. (F) Phage abundance in the colony at 48h is inversely proportional to the initial abundance of PA14 in the colony inoculum. PAO1 was held constant at  $10^2$  CFU/col.

275 We observed two significant differences between mono- and 292  
 276 co-culture colonies, however. First, as in the liquid co- 293  
 277 culture, phage resistance was much less likely to emerge, 294  
 278 with no phage resistance in mixed colonies infected with 295  
 279 the low phage dose (Fig. 2D, S5), while at high infec- 296  
 280 tive dose,  $0.6 \pm 0.3\%$  of cells were resistant compared to the 297  
 281 vast majority in the mono-culture colonies (Fig. S2). Sec- 298  
 282 ond, co-culture colonies contained a lower infectious load 299  
 283 (fewer phage per sensitive bacteria) compared to mono- 300  
 284 culture colonies at the end of the experiment ( $df = 20$ ,  $P < 301$   
 285 0.05, Fig. 2E, Fig. S2), indicating that phage could repli- 302  
 286 cate less in the presence of PA14. To further verify this, we  
 287 increased the number of PA14 in the colony inocula while 303  
 288 keeping PAO1 constant, and found that phage abundance in 304  
 289 the colony follows a strong negative correlation with initial 305  
 290 PA14 abundance (Spearman's  $\rho = 0.91$ ,  $P < 10^{-7}$ , Fig. 2F). 306  
 291 Both these findings can be explained by what we observe in 307

the images: since only a small portion of the edge of a mixed colony is made up of PAO1 cells (Fig. 2B, white arrows), the effective population size of PAO1 (i.e. number of growing cells) is smaller in the presence of PA14 than in its absence (28, 35), making the emergence of resistance less likely (Fig. 1D), and keeping phage populations that infect them smaller (Fig. 2F).

Given that the phage seems to mainly infect PAO1 in the edges of both mixed and mono-culture colonies, we hypothesized that we would find phage refuges containing uninfected cells in both conditions, regardless of the presence of PA14.

**All colony centers contain phage-free refuges where sensitive PAO1 remain uninfected.** To search for uninfected PAO1 in different areas of the colonies, we sampled the mono-culture and mixed colonies previously exposed to  $\sim 10^6$  PFU/ml by touching them with sterile toothpicks in

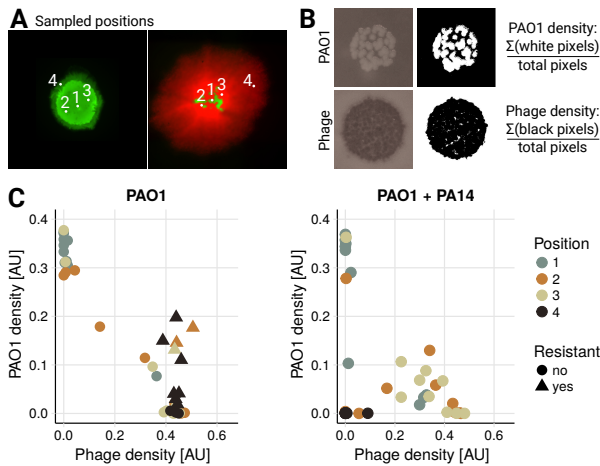

**Fig. 3.** Sampling colonies to determine co-occurrence patterns of phage and bacteria. (A) The white dots indicate where we sampled in each colony using sterile toothpicks (same images as in Fig. 2B). Position 2 and 3 are equidistant from the center (position 1). (B) The toothpick-attached cells and phage were resuspended and a small drop of the suspension placed on LB agar containing gentamicin, and on soft LB agar containing PAO1. On the left are two representative images of these drops after ~15h at 37°C. To quantify the density of bacteria and phage, we applied a threshold to the images (two images on the right) and then calculated the proportion of white and black pixels in each picture respectively. These values are plotted in panel C. (C) Density of PAO1 and phage in each sample. Each dot or triangle corresponds to a sample in one position in one colony. The left and right panels show samples taken from 10 PAO1 and 10 mixed colonies, respectively (4x10=40 points on each plot). Resistance was determined by similarly thresholding images of drops grown on LB agar with gentamicin and saturated with  $\sim 10^{10}$  phage (see Fig. S10, S11 for the full data set). The different colors represent the positions sampled as shown in panel A.

four different locations (Fig. 3A), resuspending the cells and phage on the toothpicks in PBS and then spotting a drop of each suspension onto different agar plates to quantify the density of PAO1, phage, and PAO1 cells that had become resistant to phage (see Methods). To analyze these data (Fig. S10, S11), we imaged each drop after 15h of growth and processed the images (Fig. 3B) to quantify the density of healthy PAO1 cells and phage plaques in each position.

In agreement with previous experiments, we only observed resistant PAO1 cells in samples coming from the mono-culture colonies, and these were detected in positions sampled further away from the colony center (Fig. 3C, S12, triangles). Moreover, in line with our previous observation that PAO1 at the edge were killed by phage, sampling at the edge of the mixed colonies yielded very few PAO1 cells, and also very few phage (Fig. 3C, S12 black dots close to origin in right panel).

For all remaining samples (where sensitive PAO1 and phage density were  $> 0.1$ ), phage density correlated negatively with the density of PAO1 (Pearson's  $\rho = -0.9$ ,  $P < 10^{-10}$ ), as one would expect. We also found that 35% of the samples from the mono-culture colonies and 20% from the mixed colonies had sensitive PAO1 cells close to the center that were completely uninfected by the phage (top left points in Fig. 3C, with PAO1 density  $> 0.25$ ). This supports the presence of phage-protected refuges in the centers of all colonies, and rejects the hypothesis of phage-free refuges being caused solely by the presence of PA14.

This assay can be seen to represent a scenario where cells

would have a chance to leave a biofilm and reseed a new environment. Cells from the refuges that were uninfected by phage would begin to grow and start new, healthy colonies (see also Fig. S7).

### Forced growth arrest and competition with a resistant PAO1 strain recapitulate our findings.

To explain why many sensitive cells in the colony centers remained uninfected with or without PA14, we put forward two hypotheses that we tested next: first, that cells in the center of any colony can avoid phage infection because of a lack of growth; and second, that phage-resistant cells (not only insensitive PA14, but also newly emerging resistant cells) could create phage-free refuges in colonies by preventing phage spreading through reduced phage amplification. Accordingly, we repeated the experiment of Fig. 2A with two new conditions: in the first, we used phage-sensitive PAO1 cells (wildtype) but after the 12 hours of growth, we moved them onto agar lacking LB and containing EDTA to arrest bacterial growth, forcing them into stationary phase (36); and in the second we combined our wild-type PAO1 with 10x more of a phage-resistant PAO1 strain isolated from the experiments described above (see Methods, Fig. S7F). These resistant mutants were found to be lacking the galU gene (Fig. S13), resulting in a loss of LPS and preventing phage attachment, as observed in previous work (37, 38) and verified by an adsorption assay (Fig. S9). A significant fitness cost was associated with the loss of LPS, as shown in a co-culture of wild-type and mutant PAO1 without phage (Fig. S15B, G).

The growth-arrested colony grew slightly (by  $131 \pm 33.4\%$  over 36 hours), and the phage increased 19.9-fold, approximately 3 orders of magnitude less than in a PAO1 colony growing on LB agar (Fig. S14A, E). Even though the phage replicated, they were not detected in the colony centers (0 in all three replicates). In contrast, phage were found in the centers of colonies of the mixed phage-sensitive and -resistant PAO1, at an infectious load that was similar to the mono-culture colonies (Fig. S15J). In other words, even though the colony started with 10x more resistant cells, phage could still easily infect the sensitive bacteria and spread through the colonies (Fig. S15A, C). It is therefore unlikely that a rare mutant arising in a wild-type colony would provide protection to the sensitive cells, at least in part due to their reduced fitness. No phage were detected in the centers of control colonies containing only resistant PAO1, which were instead comparable to PA14 mono-culture colonies (Fig. S14F).

The data from these treatments support our previous conclusion: to reach the center of *P. aeruginosa* colonies, Pseudomonas phage 352 needs to attach to the surfaces of bacterial cells, and infect them while they are actively growing and dividing. Since phage-free refuges were observed in some mono-culture colonies where no resistance was detected (Fig. S11), and since phage could easily infect wild-type PAO1 in the presence of a large initial population of resistant PAO1, we conclude that growth arrest plays a more important role in protecting sensitive bacteria against phage infection compared to being surrounded by resistant or insensitive cells that phage cannot attach to or infect.

## Discussion

In sum (Fig. 4), we show that phage-sensitive bacteria are more likely to survive a phage attack if they are growing on a solid surface than in liquid culture. This is mainly because cells grow more slowly in the colony center, making the phage replicate more slowly and reducing their ability to amplify, lyse cells and spread into the center (Fig. 4B). The uninfected, phage-sensitive cells that remain can then potentially seed new, healthy bacterial colonies, if dispersed. We found little evidence that an insensitive strain (or a newly emerging resistant strain) further protects sensitive bacteria from the phage (Fig. 4C). Sensitive bacteria are, however, most likely to develop resistance to the phage in the absence of competing strains, where they can grow to a sufficiently large effective population size (Fig. 4B). Competitors thus reduce the likelihood of resistance evolution.

Others have previously observed that sensitive bacteria can survive phage attack in biofilms (26, 39), and proposed that this may be due to a high bacterial density or large molecules that reduce phage diffusion, such as exopolysac-

charides (40, 41). A recent study showed that *Escherichia coli* produces an amyloid fiber network that protects cells in a biofilm individually and reduces phage diffusion (41). Survival in the face of phage can instead occur because the bacteria reduce the expression of their phage receptors (42), or because they slow down growth as nutrients are depleted (40, 43, 44). Our data support a model whereby growth arrest can prevent phage infection (26, 32, 45–48).

We were curious whether spatially organized bacterial strains could protect each other against phage, as for different forms of environmental assault. For example, antibiotic-resistant cells can protect sensitive ones from antibiotics. This is because resistant cells can break down antibiotics and “detoxify” their local environment, allowing targeted susceptible cells in close proximity to survive and grow (49–52). Bacteria can also protect others against predators (53). To our knowledge, two studies have investigated cross-protection by infecting co-cultures of resistant and susceptible bacteria with phage. In the first, Tzipilevich *et al.* (54) found that rather than cross-protection, a sensitive strain of *Bacillus subtilis* actually conferred temporary phage-sensitivity to its previously resistant neighbor. This happened through the horizontal transfer of phage attachment molecules from lysed sensitive cells to intact resistant ones. In contrast, Payne *et al.* (55) demonstrated that cross-protection against phage T7 can occur between two strains of *E. coli*, where one harbored a CRISPR-based resistance. Cross-protection was observed both in liquid and on a bacterial lawn. One key difference to our study is that their CRISPR-immune cells remove the phage from the environment through adsorption and degradation, and then stop growing, whereas in our system, phage do not even attach to insensitive PA14 cells. PA14 cells simply do not seem to interact with the phage.

The range of different experimental outcomes leads us to conclude that cross-protection against phage strongly depends not only on growth conditions, but also on the choice of phage and bacteria, including their resistance mechanism. First, our finding that *Pseudomonas* phage 352 cannot infect growth-arrested sensitive cells may not apply to other phages. Phage T4, for example, is similarly unable to infect stationary phase *E. coli* cells, but phage T7 can (33, 56). Other phages of different sizes or hydrophobicities may be better or worse at diffusing through biofilm (57). Second, it is possible that a greater protective effect between our particular strains would be observed under different growth conditions, for example if we were to provide our bacteria with nutrients that were constantly replenished to limit growth arrest. Third, since PA01 and PA14 compete with one another, they tend to separate in space. Strains that rely on each other to grow have instead been shown to remain mixed in colonies (58, 59). Increased mixing may then increase cross-protection against phage.

Collectively, we are revealing that the way in which phage shape microbial community dynamics depends on strain identity and environmental conditions. This realization may explain why in phage therapy, for example, such large discrepancies are observed between laboratory results and *in vivo* trials (10, 11, 14, 15). But despite the simplicity of our

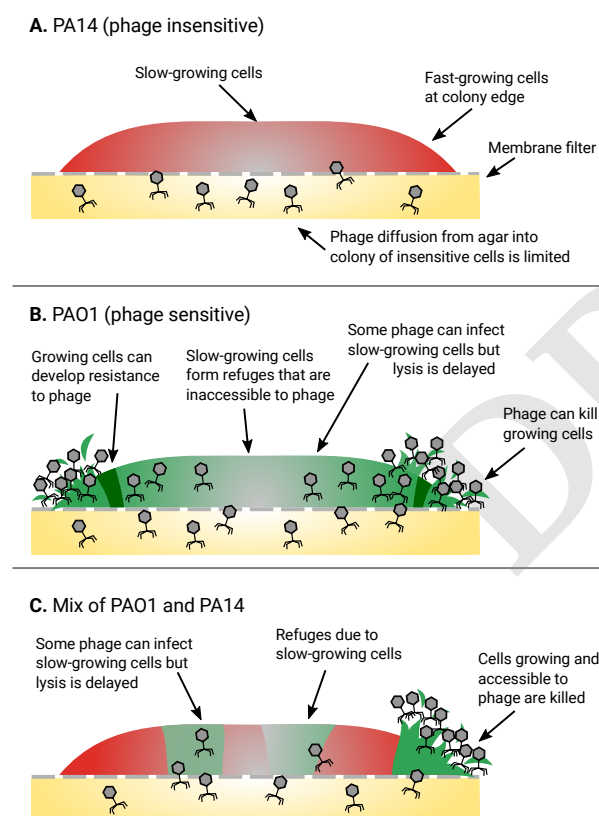

**Fig. 4.** We propose a model for how *Pseudomonas* phage 352 infects colonies of single and mixed PA01 and PA14 strains. Each drawing shows a cross-section of a bacterial colony, where higher bacterial growth rates are represented by solid colors and slower-growing bacteria by grey. (A) Phage infection and penetration into colonies of insensitive PA14 is limited. The same was found for PA01 that had acquired resistance. (B) PA01 colonies are increasingly infected towards the colony edges, correlating with growth rate (28). Phage resistance (dark green) is observed closer to the edges where growth and infection are occurring. Slow-growing cells toward the colony center form phage refuges. There, phage infect some cells of which only a subset is lysed. (C) In a mixture of sensitive and insensitive bacteria, insensitive cells reduce phage abundance overall, but phage-free refuges are mainly due to slow growth in the center. The emergence of phage resistance is limited in the presence of PA14.



471 colony model relative to an *in vivo* system, our insights are 527  
472 important: Biofilms – a typical mode of growth in an infec- 528  
473 tion – appear to be more difficult to treat with phage com- 529  
474 pared to liquid cultures; a fitness trade-off between phage re- 530  
475 sistance and fitness (Fig. S15) is likely to be very common,  
476 meaning that phage-resistant strains are typically less virulent 531  
477 than wildtype strains (reviewed in (13)). Resistance evolution 532  
478 is therefore likely to pose less of a threat in practice than cells 533  
479 remaining completely uninfected by phage and dispersing to 534  
480 cause new phage-free infections. We still need to understand 535  
481 whether and under what conditions strain diversity can re- 536  
482 duce phage efficacy, but here we show that competition with 537  
483 other strains can reduce the likelihood of resistance evolution. 538  
484 Future research should go beyond dual-strain interactions to 539  
485 better mimic the diversity in natural environments. 540  
486 Finally, we highlight the importance of spatial structure for 541  
487 the ecology and evolution of microbial populations. In a liq- 542  
488 uid environment, phage may drive sensitive strains locally 543  
489 extinct, potentially destabilizing the bacterial community. In 544  
490 a multi-strain biofilm, phage may instead generate diversity 545  
491 through uneven infection, which creates local areas of either 546  
492 phage-resistant, phage-infected or phage-protected bacteria 547  
493 (Fig. 3C, Fig. 4), each subject to different selection pres- 548  
494 sures (43). In turn, phage have access to different bacte- 549  
495 rial niches (43, 60). The resulting co-evolutionary dynam- 550  
496 ics mean that spatially organized bacteria-phage populations, 551  
497 which are likely to be the norm in many environments, may 552  
498 be key to maintaining the diversity, stability and the evol- 553  
499 ability of microbial communities. 554

## 500 Materials and Methods 555

### 501 Bacterial strains, phage, media and culture con- 556

502 ditions. Experiments were performed with two different 557  
503 strains of *Pseudomonas aeruginosa*: strain PAO1 modified 558  
504 with a miniTn7 transposon containing a GFP or DsRed 559  
505 marker, which was susceptible to a specific phage, and strains 560  
506 PA14 (PA14-WT) or modified with a Tn7 transposon contain- 561  
507 ing an mCherry marker (PA14-mCherry), which were both 562  
508 resistant to this same phage. Both transposons contained a 563  
509 gentamicin resistance gene. All three strains were kindly 564  
510 provided by Kevin Foster. The phage used for this study 565  
511 was *Pseudomonas* phage 352, Myoviridae morphotype A1, 566  
512 previously  $\phi$ 14 (61, 62) (received from D. Haas, J.-F. Vieu, 567  
513 E. Ashenov and R. Lindberg). We chose this phage among 568  
514 14 that we tested based on a spot assay that produced phage 569  
515 plaques on PAO1-GFP but not the two PA14 strains, which 570  
516 were entirely resistant. 571

517 Overnight cultures were grown in tryptic soy broth (TSB; 572  
518 Bacto™, Detroit, MI, USA) at 37°C, shaken at 200 rpm. 573  
519 Before each experiment, the optical density (OD<sub>600</sub>) of the 574  
520 overnight cultures of PAO1-GFP, and either PA14-mCherry 575  
521 or PA14-WT strains (depending on the experiment) was mea- 576  
522 sured with a spectrophotometer (Ultrospec 10, Amersham 577  
523 Biosciences). Bacterial overnight cultures were then inoc- 578  
524 ulated into Erlenmeyer flasks (100 ml) containing 20 ml of 579  
525 TSB to obtain a standardized OD<sub>600</sub> of 0.05. Bacterial cul- 580  
526 tures were grown in a shaking incubator at 200 rpm and 37°C 581

for 3 hours to obtain bacteria in exponential phase with a final  
concentration of approximately 10<sup>8</sup> CFU/ml at the beginning  
of each experiment. These cultures were then diluted in PBS  
to the desired starting population size.

**Quantifying bacterial and phage populations.** To quan-  
tify bacterial colony-forming units (CFU) and plaque-  
forming units (PFU) of phages, in liquid assays, CFUs and  
PFUs were measured directly, while for colonies, bacteria  
and phage (if applicable) were first extracted from the filters  
and suspended in PBS (see below). Suspensions coming from  
phage-treated liquid cultures or colonies were centrifuged at  
8000 rpm for 15 minutes at 4°C. Following centrifugation,  
the supernatant containing phage was kept in the fridge at  
4°C and later used to measure PFUs. The centrifuged bac-  
terial pellet was resuspended in either 200 $\mu$ l (liquid) or 1ml  
(colonies) of PBS, and then washed 3 times with 1 ml of fresh  
PBS at 8000 rpm, 4°C for 5 minutes to remove all the poten-  
tial phages remaining in the pellet.

CFUs were quantified by serially diluting all cell suspensions  
(from liquid cultures or colonies, with or without phage) from  
10<sup>0</sup> to 10<sup>-7</sup> in PBS, and spreading 10 $\mu$ l drops in lines across  
Tryptic Soy Agar (TSA) or Luria-Bertani (LB) agar plates.  
After 15h in a 37°C incubator, colonies were counted at the  
most appropriate dilution. To distinguish the two *P. aerug-*  
*inosa* strains, co-cultures were plated onto TSA or LB agar  
plates to count non-fluorescent PA14-WT CFUs and onto LB  
agar plates containing 10 $\mu$ g/ml of gentamicin to count only  
PAO1-GFP CFUs. In experiments where PAO1-GFP and  
PA14-mCherry were co-cultured, both strains were resistant  
to gentamicin, and were only plated onto TSA or LB agar and  
distinguished by their fluorescence. PFUs were quantified  
similarly, except that drops were spread in lines across 20ml  
soft LB agar (30g/L TSB + 7g/L agar) mixed with 300 $\mu$ l of  
PAO1 overnight culture and allowed to dry for 1h in a laminar  
flow hood. For the treatments involving phage in colonies,  
the whole agar was also collected and put in 50 ml falcon  
tubes containing 10 ml of PBS, well-shaken, centrifuged for  
15 minutes at 4000 rpm at 4°C and the supernatant contain-  
ing phages further diluted in PBS to count the PFUs. Phage  
concentrations from the filter including the colony, the agar  
and the touched colony center (see below) were summed up  
to obtain the final PFU/colony value.

The rate of resistance of PAO1 to the phage was calculated  
in two ways. In the first method, 10 $\mu$ l of a solution contain-  
ing 10<sup>10</sup> PFU/ml was streaked in a straight line across an LB  
agar plate. Then, having previously plated PAO1 to count  
CFUs, individual colonies were picked and streaked in paral-  
lel lines perpendicular to the line containing phage, and the  
plate incubated for 15h at 37°C. Picked colonies that resulted  
in solid lines across the length of the plate were classified as  
resistant, while bacteria in lines that were truncated where  
the phage had been spread were considered to be sensitive.  
For the second method, we plated cultures on TSA plates on  
which we had previously spread 500 $\mu$ l containing approx-  
imately 10<sup>10</sup> PFU/ml of pre-absorbed phages, and allowed  
to dry. If PAO1-GFP were growing in co-culture with PA14-  
WT, plates additionally containing 10  $\mu$ g/ml gentamicin were

584 used. To evaluate resistance rates, the CFUs/colony of PAO1- 639  
585 GFP growing on plates saturated with phages (resistant) was 640  
586 then compared to the CFUs/colony growing on plates with no 641  
587 phage (total uninfected). 642

588 **Phage treatment in liquid cultures.** A 96-well plate was 644  
589 filled with 200  $\mu$ l of TSB in each well, additionally con- 645  
590 taining  $10^6$  CFU/ml PAO1-GFP or  $10^8$  CFU/ml PA14-WT 646  
591 alone, or together with or without  $10^6$  PFU/ml of phages 647  
592 (MOI(PAO1)=1). In PA14 mono-cultures,  $10^8$  PFU/ml were 648  
593 inoculated (MOI(PA14)=1). Initial population sizes of bacte- 649  
594 ria and phage were quantified prior to mixing. Each condi- 650  
595 tion (PAO1-GFP alone, PA14-WT alone, and the co-culture) 651  
596 was performed in triplicate. These initial population sizes 652  
597 were chosen since they allowed the two strains to co-exist 653  
598 and grow over 48 hours (PAO1 is more competitive). The 654  
599 plate was then put in a Tecan Infinite 200 PRO plate reader at 655  
600  $37^\circ\text{C}$  under agitation for 48 hours. After 6, 24 and 48 hours, 656  
601 the samples were transferred into Eppendorf tubes, washed, 657  
602 serially diluted and plated as described above. 658

603 **Quantifying phage resistance rates in liquid.** To under- 660  
604 stand the role of population size on resistance emergence, two 661  
605 experiments were performed (Fig. 1E, F). In the first, a 96- 662  
606 well plate was filled with 10 up to  $10^8$  CFU/ml of PAO1- 663  
607 GFP, with 10-fold increases, together with phage to achieve 664  
608 an MOI(PAO1)=1 in 200  $\mu$ l of TSB. We grew the bacteria for 665  
609 21 hours at  $37^\circ\text{C}$  under agitation in the plate reader, and then 666  
610 assessed phage resistance rates and total population sizes as 667  
611 described above. For the second experiment, a 96-well plate 668  
612 was filled with  $10^6$  CFU/ml of PAO1-GFP and phages at an 669  
613 MOI(PAO1)=1 in 200  $\mu$ l of TSB, to which we added increas- 670  
614 ing amounts of PA14, starting at  $10^2$  up to  $10^8$  in 10-fold 671  
615 increments. Bacteria were again grown in the plate reader 672  
616 for 21 hours at  $37^\circ\text{C}$  under agitation, at the end of which we 673  
617 assessed phage resistance rates and total population sizes of 674  
618 both strains as described above. 675

619 **Colony experiments and phage treatment.** To grow bac- 676  
620 teria in a colony, liquid cultures were prepared and a drop 677  
621 spotted onto a membrane filter (Isopore® Membrane,  $0.2\mu\text{m}$  678  
622 PC membrane, GTTP02500, Merck) previously placed in the 679  
623 centre of agar plates containing 0.1x LB (1 g/L of tryptone 680  
624 (ThermoScientific™ Oxoid™ Tryptone), 0.5 g/L of yeast ex- 681  
625 tract (ThermoScientific™ Oxoid™ Yeast Extract Powder), 682  
626 10 g/L of NaCl (ACROS Organics™, 99.5%) and 15 g/L of 683  
627 agar (Bacto™ agar solidifying agent, BD Diagnostics)). Liq- 684  
628 uid cultures of the two strains were prepared as described for 685  
629 the liquid experiments and diluted in PBS to obtain a final 686  
630 concentration of  $10^4$  CFU/ml of PAO1-GFP and  $10^5$  or  $10^6$  687  
631 CFU/ml of PA14-WT (for a ratio of 1:10 or 1:100, respec- 688  
632 tively). 100 $\mu$ l of each strain were mixed together, or with 689  
633 100 $\mu$ l of PBS for the mono-culture colonies. A 2 $\mu$ l drop of 690  
634 the mixture was then spotted onto the filter. Nine replicate 691  
635 plates were prepared for each condition (PAO1-GFP, PA14- 692  
636 WT or mCherry, and the mixture of both), and incubated at 693  
637  $37^\circ\text{C}$ . After 12 hours of incubation, three replicates were re- 694  
638 moved in order to count the CFUs of both strains by remov-

ing the filters from the agar using sterile tweezers and plac-  
ing them in tubes containing 3 ml of PBS. The tubes were  
extensively vortexed to remove and resuspend the colonies in  
the PBS, the filters removed and the bacteria plated to count  
CFUs as described above. Among the six remaining repli-  
cates, three were placed onto new 0.1x LB agar plates with-  
out phage and the three others were placed onto new 0.1x LB  
agar plates pre-absorbed with a 50 $\mu$ l drop containing  $\sim 10^6$  or  
 $\sim 10^9$  phages (diameter similar to filter diameter) depending  
on the experiment, and incubated at  $37^\circ\text{C}$ . After  $\sim 36$  hours, to  
quantify phage infectious load in the colony center of phage-  
treated colonies, we touched a sterile, plastic inoculation loop  
to the top center of each colony (without going deep enough  
to touch the filter) and resuspended its contents in 1ml of  
PBS. We then quantified CFUs and PFUs of this suspension  
as described above. The Isopore® filters with the remain-  
ing majority of the colony were then carefully removed with  
sterile tweezers, resuspended in 3ml of PBS, and the suspen-  
sion used to quantify CFUs and PFUs as described above (the  
phage-treated colonies with the centrifugation step described  
previously). Finally, the remaining agar was used to quantify  
PFUs as described above. For the experiments where we ar-  
rested the growth of PAO1 after 12 hours, agar plates were  
prepared containing 10g/L of NaCl, 15 g/L of Bacto™ agar  
and 0.05mM of EDTA. These plates were either spotted with  
a drop containing phage or no drop, and the filters transferred  
onto them as described above.

**Phage adsorption test.** To test whether phage could adsorb  
to the different strains, we prepared (on ice) a solution con-  
taining  $\sim 10^6$  bacteria (either PAO1, PA14, PA14-mCherry or  
PAO1 res2) and added  $\sim 10^6$  phage to each. We quantified the  
PFUs in the starting inoculum of phage as described above.  
After 5 and 10 minutes on ice, we filtered 2ml of the sus-  
pension using 3ml Omnifix® syringe filters with a pore size  
of  $0.22\mu\text{m}$  (Cobetter®), and quantified the PFUs in the su-  
pernatant as described above. A reduction of phage in the  
supernatant indicated that the phage had attached to the cells,  
and ended up in the pellet rather than the supernatant (Fig.  
S9).

**Toothpick sampling assay.** To assess where in the colonies  
phage and infected or uninfected PAO1 bacteria were lo-  
cated, the experiments were repeated using 10 replicate PAO1  
colonies and 10 mixed (PAO1 and PA14) colonies. We de-  
fined four locations to sample from in each colony as shown  
in Fig. 3A, taking care to sample only from the top of that  
area (not going so deep as to touch the filter). Note that  
this is not a very precise method. Each toothpick was then  
suspended in 300ml of PBS, vortexed, and 5 $\mu$ l of the result-  
ing solution inoculated onto (i) LB agar plates to quantify  
overall bacterial density, (ii) gentamicin-containing LB agar  
plates to quantify PAO1 density, (iii) gentamicin-containing  
LB agar plates saturated with approximately  $10^{10}$  PFU/ml  
of pre-absorbed phages to quantify PAO1 resistance and (iv)  
TSB + soft agar containing PAO1 as described above to quan-  
tify phage density. After  $\sim 15$  hours of growth at  $37^\circ\text{C}$ , we  
imaged each of the resulting spots using a Dino-Lite Edge



695 microscope.

696 **Microscopy and image analysis.** Images of the colonies 753  
697 were acquired after 12 and 48 hours using a Zeiss AXIO 754  
698 Imager M1 fluorescence microscope and a 2.5x objective. 755  
699 PAO1-GFP colonies were imaged using a GFP filter set 756  
700 (excitation: 470/40, emission: 525/50) and PA14-mCherry 757  
701 colonies using an mCherry filter set (excitation: 545/30, 758  
702 emission: 620/60, with automatic exposure), and for mixed 759  
703 colonies, an overlay of the two images was produced using 760  
704 imageJ. Since some colonies after 48 hours were too large 761  
705 to fit in one image, a series of 3×3 images were acquired 762  
706 and stitched together using autostitch software (63). For the 763  
707 toothpick sampling assay, each image was manually cropped 764  
708 to 600×600 pixels, converted to grayscale, and a threshold 765  
709 applied using the Matlab Image Processing toolbox to yield 766  
710 the photos in Fig. 3B, S10, and S11. We then summed the 767  
711 black pixels and white pixels to compute phage or bacterial 768  
712 density, respectively, and divided them by the total number 769  
713 of pixels.

714 For the transmission electron microscopy (Fig. S8), the fil- 770  
715 ter and colony were removed with sterile tweezers, placed 771  
716 upside-down and fixed in a 2.5% glutaraldehyde solution 772  
717 (EMS, Hatfield, PA) in phosphate buffer (PB 0.1 M, pH 7.4) 773  
718 for 1h at room temperature (RT) and post-fixed in a fresh 774  
719 mixture of 1% osmium tetroxide (EMS) with 1.5% of potas- 775  
720 sium ferrocyanide (Sigma, St. Louis, MO) in PB buffer for 776  
721 1h at RT. The samples were then washed twice in distilled 777  
722 water and dehydrated in ethanol solution (Sigma, St Louis, 778  
723 MO, US) at graded concentrations (30% for 40 mins; 50% 779  
724 for 40 mins; 70% for 40 mins; 100% for 2×30 mins). This 780  
725 was followed by infiltration in 100% Epon resin (EMS, Hat- 781  
726 field, PA, US) over-night, and finally polymerized for 48h 782  
727 at 60°C in an oven. Ultrathin sections of 50nm thick were 783  
728 cut transversally to the filter, using a Leica Ultracut (Leica 784  
729 Mikrosystem GmbH, Vienna, Austria), picked up on a cop- 785  
730 per slot grid 2×1mm (EMS, Hatfield, PA, US) coated with a 786  
731 polystyrene film (Sigma, St Louis, MO, US). Sections were 787  
732 post-stained with uranyl acetate (Sigma, St Louis, MO, US) 788  
733 4% in water for 10 mins, rinsed several times with water fol- 789  
734 lowed by Reynolds lead citrate in water (Sigma, St Louis, 790  
735 MO, US) for 10 mins and rinsed several times with water. 791  
736 Micrographs were taken with a transmission electron micro- 792  
737 scope FEI CM100 (FEI, Eindhoven, the Netherlands) at an 800  
738 acceleration voltage of 80kV with a TVIPS TemCamF416 801  
739 digital camera (TVIPS GmbH, Gauting, Germany). 802

740 **Identifying resistance mutation in PAO1.** PAO1 mutant 806  
741 cells were added to 45  $\mu$ l of lysis buffer (10mM Tris- 807  
742 HCL, 1mM EDTA, 0.1% Triton X adjusted to pH 8.0 using 808  
743 NaOH; 2.5 $\mu$ l of 20mg/ml solution of lysozyme, Sigma- 809  
744 Aldrich, 62971-10G-F; 2.5 $\mu$ l of 10mg/ml proteinase K, 810  
745 Sigma-Aldrich). The sample was lysed using a thermocyc- 811  
746 ller (20 mins at 37°C, 20 mins at 55°C, 20 mins at 95°C). 812  
747 The galU gene was amplified from the lysate with forward 813  
748 (5'-CCGACAAGGAAAAGTACCTGG-3') and reverse 814  
749 (5'-CGCTTGCCCTTGAAGTGTAG-3') primers. The reac- 815  
750 tion mixture (25  $\mu$ l, final volume) contained 15.375  $\mu$ l 816

of nuclease-free water, 5  $\mu$ l of 5× Gotaq buffer (Promega M792A), 1 $\mu$ l of 10 $\mu$ M forward primer, 1 $\mu$ l of 10 $\mu$ M reverse primer, 0.5  $\mu$ l of 10 $\mu$ M dNTP mix (Promega U151B), 1U of GoTaq G2 DNA polymerase (Promega, M784B) and 2 $\mu$ l of bacterial lysate. The PCR was performed with the thermocycler: 5 mins of initial denaturation at 95°C, followed by 35 cycles of denaturation (30s at 95°C), annealing (30s at 55°C), and extension (50s at 72°C), with a final extension step (8 mins at 72°C). Amplified products from all samples were verified by gel electrophoresis (Fig. S13).

**Statistical analysis.** Each experiment was performed using three biological replicates per condition. Due to this low replicate number, we compared treatments using two-tailed t-tests. Experiments were then repeated on separate occasions, and results are reported in supplementary material. We combined data from corresponding treatments across experiments by fitting a linear model to the data and applying a blocked ANOVA test. To test whether phage and bacterial densities correlated in the toothpick assay, we used Pearson's correlation test.

#### ACKNOWLEDGEMENTS

We would like to thank Harald Brüssow, Kevin Foster, Flor Arias-Sánchez and Shawna McCallin for insightful discussions. We thank Kevin Foster for the bacterial strains, Dieter Haas posthumously for the phage, Marc Garcia-Garcerà for extracting the DNA and running a PCR on the mutant strain, and Semhar Ghebrehiet Tekle for constructing the mCherry plasmid. We appreciate the assistance of Damien De Bellis and the Electron Microscopy Facility (EMF) at the University of Lausanne (UNIL) and thank them for their support. ST and PP were funded by the University of Lausanne, FO by an SNF Early Postdoc.Mobility grant, SB and SM by ERC Starting grant 715097.

#### Bibliography

1. Lucía Fernández, Ana Rodríguez, and Pilar Garcia. Phage or foe: an insight into the impact of viral predation on microbial communities. *The ISME Journal*, 2018. ISSN 1751-7362. doi: 10.1038/s41396-018-0049-5.
2. Mohammadali Khan Mirzaei and Corinne F. Maurice. Ménage à trois in the human gut: interactions between host, bacteria and phages. *Nature Reviews Microbiology*, 15(7):397–408, may 2017. doi: 10.1038/nrmicro.2017.30.
3. Pauline D Scanlan. Bacteria-Bacteriophage Coevolution in the Human Gut: Implications for Microbial Diversity and Functionality. *Trends in microbiology*, 393(0):16–23, mar 2017. doi: 10.1016/j.tim.2017.02.012.
4. Jennifer R et al Brum. Ocean plankton. Patterns and ecological drivers of ocean viral communities. *Science*, 348(6237):1261498, may 2015. doi: 10.1126/science.1261498.
5. Felipe H. Coutinho et al. Marine viruses discovered via metagenomics shed light on viral strategies throughout the oceans. *Nature Communications*, 8:15955, jul 2017. doi: 10.1038/ncomms15955.
6. Stephen T. Abedon, Pilar Garcia, Peter Mullany, and Rustam Aminov. Editorial: Phage Therapy: Past, Present and Future. *Frontiers in Microbiology*, 8:981, jun 2017. doi: 10.3389/fmicb.2017.00981.
7. Jeroen De Smet, Hanne Hendrix, Bob G. Blasdel, Katarzyna Danis-Wlodarczyk, and Rob Lavigne. Pseudomonas predators: understanding and exploiting phage-host interactions. *Nature Reviews Microbiology*, jun 2017. ISSN 1740-1526. doi: 10.1038/nrmicro.2017.61.
8. Evelina Tacconelli et al. Discovery, research, and development of new antibiotics: the WHO priority list of antibiotic-resistant bacteria and tuberculosis. *The Lancet Infectious Diseases*, 0(0), dec 2017. ISSN 14733099. doi: 10.1016/S1473-3099(17)30753-3.
9. Marta Lourenço, Luísa De Sordi, and Laurent Debarbieux. The Diversity of Bacterial Lifestyles Hampers Bacteriophage Tenacity. *Viruses*, 10(6), 2018. doi: 10.3390/v10060327.
10. C Lerondelle and B Poutrel. [Bacteriophage treatment trials on staphylococcal udder infection in lactating cows (author's transl)]. *Annales de recherches vétérinaires. Annals of veterinary research*, 11(4):421–6, 1980. ISSN 0003-4193.
11. Haiqing Sheng, Hannah J Knecht, Indira T Kudva, and Carolyn J Hovde. Application of bacteriophages to control intestinal *Escherichia coli* O157:H7 levels in ruminants. *Applied and environmental microbiology*, 72(8):5359–66, aug 2006. doi: 10.1128/AEM.00099-06.
12. R J Atterbury et al. Bacteriophage therapy to reduce salmonella colonization of broiler chickens. *Applied and environmental microbiology*, 73(14):4543–9, jul 2007. doi: 10.1128/AEM.00049-07.
13. Frank Oechslin. Resistance Development to Bacteriophages Occurring during Bacteriophage Therapy. *Viruses*, 10(7):351, jun 2018. doi: 10.3390/v10070351.
14. Damien Maura, Eric Morello, Laurence du Merle, Perrine Bomme, Chantal Le Bouguéneec, and Laurent Debarbieux. Intestinal colonization by enteroaggregative *Escherichia coli* supports long-term bacteriophage replication in mice. *Environmental Microbiology*, 14(8):1844–1854, 2012. ISSN 14622912. doi: 10.1111/j.1462-2920.2011.02644.x.

- 822 15. Marine Henry, Rob Lavigne, and Laurent Debarbieux. Predicting in vivo efficacy of therapeutic bacteriophages used to treat pulmonary infections. *Antimicrobial agents and chemotherapy*, 57(12):5961–8, dec 2013. doi: 10.1128/AAC.01596-13. 909
- 823 16. Daniel Schlatter, Linda Kinkel, Linda Thomashow, David Weller, and Timothy Paulitz. Disease Suppressive Soils: New Insights from the Soil Microbiome. *Phytopathology*, 107(11): 912–1284–1297, nov 2017. doi: 10.1094/PHYTO-03-17-0111-RVW. 913
- 824 17. Peter J Turnbaugh, Ruth E Ley, Micah Hamady, Claire M Fraser-Liggett, Rob Knight, and Jeffrey I Gordon. The human microbiome project. *Nature*, 449(7164):804–10, oct 2007. 915 ISSN 1476-4687. doi: 10.1038/nature06244. 916
- 825 18. Lesley A. Ogielvie and Brian V. Jones. The human gut virome: a multifaceted majority. *Frontiers in Microbiology*, 6:918, sep 2015. doi: 10.3389/fmicb.2015.00918. 918
- 826 19. Samuel Minot, Alexandra Bryson, Christel Chehoud, Gary D. Wu, James D. Lewis, and Frederic D. Bushman. Rapid evolution of the human gut virome. *Proceedings of the National Academy of Sciences*, 110(30):12450–12455, jul 2013. doi: 10.1073/PNAS.1300833110. 920
- 827 20. Michiel Vos, Philip J Birkett, Elizabeth Birch, Robert I Griffiths, and Angus Buckling. Local adaptation of bacteriophages to their bacterial hosts in soil. *Science*, 325(5942):833, aug 2009. doi: 10.1126/science.1174173. 924
- 828 21. Kathryn M. Kauffman and Martin F. Polz. Streamlining standard bacteriophage methods for higher throughput. *MethodsX*, 5:159–172, jan 2018. doi: 10.1016/J.MEX.2018.01.007. 926
- 829 22. W. R. Harcombe and J. J. Bull. Impact of phages on two-species bacterial communities. *Applied and Environmental Microbiology*, 71(9):5254–5259, 2005. ISSN 00992240. doi: 10.1128/AEM.71.9.5254-5259.2005. 929
- 830 23. Sara Mitri and Kevin Richard Foster. The Genotypic View of Social Interactions in Microbial Communities. *Annual Review of Genetics*, 47:247–73, aug 2013. ISSN 1545-2948. doi: 931 10.1146/annurev-genet-111212-133307. 932
- 831 24. Carey D. Nadell, Knut Drescher, and Kevin R. Foster. Spatial structure, cooperation and competition in biofilms. *Nature Reviews Microbiology*, 14(9):589–600, jul 2016. ISSN 1740-934 1526. doi: 10.1038/nrmicro.2016.84. 935
- 832 25. Philip S Stewart and J William Costerton. Antibiotic resistance of bacteria in biofilms. *The Lancet*, 358(9276):135–138, jul 2001. doi: 10.1016/S0140-6736(01)05321-1. 936
- 833 26. Rasmus Skytte Eriksen, Sine L Svenningsen, Kim Sneppen, and Namiko Mitarai. A growing microcolony can survive and support persistent propagation of virulent phages. *Proceedings of the National Academy of Sciences of the United States of America*, 115(2):337–342, jan 2018. doi: 10.1073/pnas.1708954115. 941
- 834 27. Stephen T. Abedon. *Bacteriophage ecology: population growth, evolution, and impact of bacterial viruses*. Cambridge University Press, 2008. ISBN 9780511541483. 942
- 835 28. Sara Mitri, Ellen Clarke, and Kevin R Foster. Resource limitation drives spatial organization in microbial groups. *The ISME Journal*, 10(6):1471–1482, jun 2016. ISSN 1751-7362. doi: 945 10.1038/ismej.2015.208. 946
- 836 29. T. A. Kojohn and G. S. Saylor. Attachment and replication of *Pseudomonas aeruginosa* T4 bacteriophages under conditions simulating aquatic environments. *Journal of General Microbiology*, 137(3):661–666, mar 1991. doi: 10.1099/00221287-137-3-661. 949
- 837 30. S. Ripp and R. V. Miller. The role of pseudolysogeny in bacteriophage-host interactions in a 950 natural freshwater environment. *Microbiology*, 143(6):2065–2070, jun 1997. doi: 10.1099/951 00221287-143-6-2065. 952
- 838 31. Marcin Los, Grzegorz Węgrzyn, and Peter Neubauer. A role for bacteriophage T4 r1 953 gene function in the control of phage development during pseudolysogeny and in slowly 954 growing host cells. *Research in Microbiology*, 154(8):547–552, oct 2003. doi: 10.1016/955 S0923-2508(03)00151-7. 956
- 839 32. Sivan Pearl, Chana Gabay, Roy Kishony, Amos Oppenheim, and Nathalie Q Balaban. Non-genetic individuality in the Host–Phage Interaction. *PLoS Biology*, 6(5):e120, may 2008. 958 doi: 10.1371/journal.pbio.0060120. 959
- 840 33. Daniel Bryan, Ayman El-Shibiny, Zack Hobbs, Jillian Porter, and Elizabeth M. Kutter. Bacteriophage T4 Infection of Stationary Phase *E. coli*: Life after Log from a Phage Perspective. *Frontiers in Microbiology*, 7:1391, sep 2016. doi: 10.3389/fmicb.2016.01391. 962
- 841 34. H. Hadas, M. Einav, I. Fishov, and A. Zariwsky. Bacteriophage T4 Development Depends on the Physiology of its Host *Escherichia Coli*. *Microbiology*, 143(1):179–185, jan 1997. doi: 964 10.1099/00221287-143-1-179. 965
- 842 35. Oskar Hallatschek, Pascal Hersen, Sharad Ramanathan, and David R Nelson. Genetic drift 966 at expanding frontiers promotes gene segregation. *PNAS*, 104(50):19926–30, dec 2007. 967 ISSN 1091-6490. doi: 10.1073/pnas.0710150104. 968
- 843 36. Yoshifumi Imamura et al. Azithromycin exhibits bactericidal effects on *Pseudomonas aeruginosa* through interaction with the outer membrane. *Antimicrobial agents and chemotherapy*, 49(4):1377–80, apr 2005. doi: 10.1128/AAC.49.4.1377-1380.2005. 971
- 844 37. Frank Oechslin, Philippe Piccardi, Stefano Mancini, Jérôme Gabard, Philippe Moreillon, José M. Entenza, Gregory Resch, and Yok-Ai Que. Synergistic interaction between phage therapy and antibiotics clears *Pseudomonas aeruginosa* infection in endocarditis and reduces virulence. *Journal of Infectious Diseases*, 207(12):1963–1970, dec 2013. doi: 10.1093/infdis/jiw632. 979
- 845 38. Shuai Le et al. Chromosomal DNA deletion confers phage resistance to *Pseudomonas aeruginosa*. *Scientific Reports*, 4(1):4738, may 2015. doi: 10.1038/srep04738. 982
- 846 39. S. J. Schrag and J. E. Mittler. Host-Parasite Coexistence: The Role of Spatial Refuges in Stabilizing Bacteria-Phage Interactions. *The American Naturalist*, 148(2):348–377, aug 1996. doi: 10.1086/285929. 985
- 847 40. James J Bull, Kelly A Christensen, Carly Scott, Benjamin R Jack, Cameron J Crandall, and Stephen M Krone. Phage-Bacterial Dynamics with Spatial Structure: Self Organization around Phage Sinks Can Promote Increased Cell Densities. *Antibiotics (Basel, Switzerland)*, 7(1), jan 2018. doi: 10.3390/antibiotics7010008. 989
- 848 41. Lucia Vidakovic, Praveen K. Singh, Raimo Hartmann, Carey D. Nadell, and Knut Drescher. Dynamic biofilm architecture confers individual and collective mechanisms of viral protection. *Nature Microbiology*, 3(1):26–31, jan 2018. ISSN 2058-5276. doi: 10.1038/s41564-017-0050-1. 993
- 849 42. E Chapman-McQuiston and X L Wu. Stochastic receptor expression allows sensitive bacteria to evade phage attack. Part I: experiments. *Biophysical journal*, 94(11):4525–36, jun 2008. doi: 10.1529/biophysj.107.120212. 996
- 850 43. Sijla Heilmann, Kim Sneppen, and Sandeep Krishna. Coexistence of phage and bacteria on the boundary of self-organized refuges. *Proceedings of the National Academy of Sciences*, 109(31):12828–12833, jul 2012. ISSN 0027-8424. doi: 10.1073/pnas.1200771109. 999
- 851 44. Matthew Simmons, Knut Drescher, Carey D Nadell, and Vanni Bucchi. Phage mobility is a core determinant of phage–bacteria coexistence in biofilms. *The ISME Journal*, 12(2): 531–543, feb 2018. doi: 10.1038/ismej.2017.190. 1002
- 852 45. C P Ricciuti. Host-virus interactions in *Escherichia coli*: effect of stationary phase on viral release from MS2-infected bacteria. *Journal of virology*, 10(1):162–5, jul 1972. 1005
- 853 46. A. M. Hayward. Lysis of RNA Phage-infected Cells depends upon Culture Conditions. *Journal of General Virology*, 22(3):431–435, mar 1974. doi: 10.1099/0022-1317-22-3-431. 1008
- 854 47. M. Middelboe. Bacterial Growth Rate and Marine Virus–Host Dynamics. *Microbial Ecology*, 40(2):114–124. doi: 10.1007/s002480000050. 1011
- 855 48. Sanna Sillankorva, Rosário Oliveira, Maria João Vieira, Ian Sutherland, and Joana Azeredo. *Pseudomonas fluorescens* infection by bacteriophage  $\Phi$ S1: the influence of temperature, host growth phase and media. *FEMS Microbiology Letters*, 241(1):13–20, dec 2004. ISSN 03781097. doi: 10.1016/j.femsle.2004.06.058. 1014
- 856 49. Robin A. Sorg et al. Collective Resistance in Microbial Communities by Intracellular Antibiotic Deactivation. *PLOS Biology*, 14(12):e2000631, dec 2016. doi: 10.1371/journal.pbio.2000631. 1017
- 857 50. Marjon G J de Vos, Marcin Zagorski, Alan McNally, and Tobias Bollenbach. Interaction networks, ecological stability, and collective antibiotic tolerance in polymicrobial infections. *Proceedings of the National Academy of Sciences of the United States of America*, 114(40): 10666–10671, oct 2017. doi: 10.1073/pnas.1713372114. 1020
- 858 51. Eugene Anatoly Yurtsev, Arolyn Conwill, and Jeff Gore. Oscillatory dynamics in a bacterial cross-protection mutualism. *Proceedings of the National Academy of Sciences*, 113(22): 6236–6241, may 2016. doi: 10.1073/pnas.1523317113. 1023
- 859 52. Isabel Frost et al. Cooperation, competition and antibiotic resistance in bacterial colonies. *The ISME Journal*, 12(6):1582–1593, jun 2018. ISSN 1751-7362. doi: 10.1038/s41396-018-0090-4. 1026
- 860 53. Carsten Matz and Staffan Kjelleberg. Off the hook – how bacteria survive protozoan grazing. *Trends in Microbiology*, 13(7):302–307, jul 2005. doi: 10.1016/J.TIM.2005.05.009. 1029
- 861 54. Elhanan Tzipilevich, Michal Habusha, and Sigal Ben-Yehuda. Acquisition of Phage Sensitivity by Bacteria through Exchange of Phage Receptors. *Cell*, 168(1-2):186–199.e12, jan 2017. doi: 10.1016/J.CELL.2016.12.003. 1032
- 862 55. Pavel Payne, Lukas Geyrhofer, Nicholas H Barton, and Jonathan P Bollback. CRISPR-based herd immunity can limit phage epidemics in bacterial populations. *eLife*, 7, mar 2018. doi: 10.7554/eLife.32035. 1035
- 863 56. Holly S. Schrader, John O. Schrader, Jeremy J. Walker, Thomas A. Wolf, Kenneth W. Nickerson, and Tyler A. Kojohn. Bacteriophage infection and multiplication occur in *Pseudomonas aeruginosa* starved for 5 years. *Canadian Journal of Microbiology*, 43(12):1157–1163, dec 1997. doi: 10.1139/m97-164. 1038
- 864 57. Nawras Ghanem, Bärbel Kiesel, René Kallies, Hauke Harms, Antonis Chatzinos, and Lukas Y. Wick. Marine Phages As Tracers: Effects of Size, Morphology, and Physico-Chemical Surface Properties on Transport in a Porous Medium. *Environmental Science & Technology*, 50(23):12816–12824, dec 2016. doi: 10.1021/acs.est.6b04236. 1041
- 865 58. M. J. I. Muller, B. I. Neugeboren, D. R. Nelson, and A. W. Murray. Genetic drift opposes mutualism during spatial population expansion. *Proceedings of the National Academy of Sciences*, 111(3):1037–1042, 2014. ISSN 0027-8424. doi: 10.1073/pnas.1313285111. 1044
- 866 59. Babak Momeni, Kristen A Briley, Matthew W Fields, and Wenyng Shou. Strong inter-population cooperation leads to partner intermixing in microbial communities. *eLife*, 2: e00230, jan 2013. ISSN 2050-084X. doi: 10.7554/eLife.00230. 1047
- 867 60. Britt Koskella and Michael A. Brockhurst. Bacteria–phage coevolution as a driver of ecological and evolutionary processes in microbial communities. *FEMS Microbiology Reviews*, 38(5):916–931, 2014. ISSN 1574-6976. doi: 10.1111/1574-6976.12072. 1050
- 868 61. Andrew M Kropinski, Lora Chan, Ken Jarrell, and F H Milazzo. The nature of *Pseudomonas aeruginosa* strain PAO bacteriophage receptors. *Canadian Journal of Microbiology*, 23(6): 653–658, jun 1977. ISSN 0008-4166. doi: 10.1139/m77-098. 1053
- 869 62. Robert B Lindberg and Ruth L Latta. Phage typing of *Pseudomonas aeruginosa*: Clinical and epidemiologic considerations. *Journal of Infectious Diseases*, 130:S33–S42, 1974. 1056
- 870 63. M. Brown and D. G. Lowe. Automatic panoramic image stitching using invariant features. *International Journal of Computer Vision*, 74(1):59–73, 2007. 1059
